# Supplementary material for: Cervical dilatation patterns of ‘low‐risk’ women with spontaneous labour and normal perinatal outcomes: a systematic review
Source: PubMed Central journal article supplement (PMC6033146; doi:10.1111/1471-0528.14930), 2017-11-03
Supplement: BJO-125-944-s003.pdf [file BJO-125-944-s003.pdf]

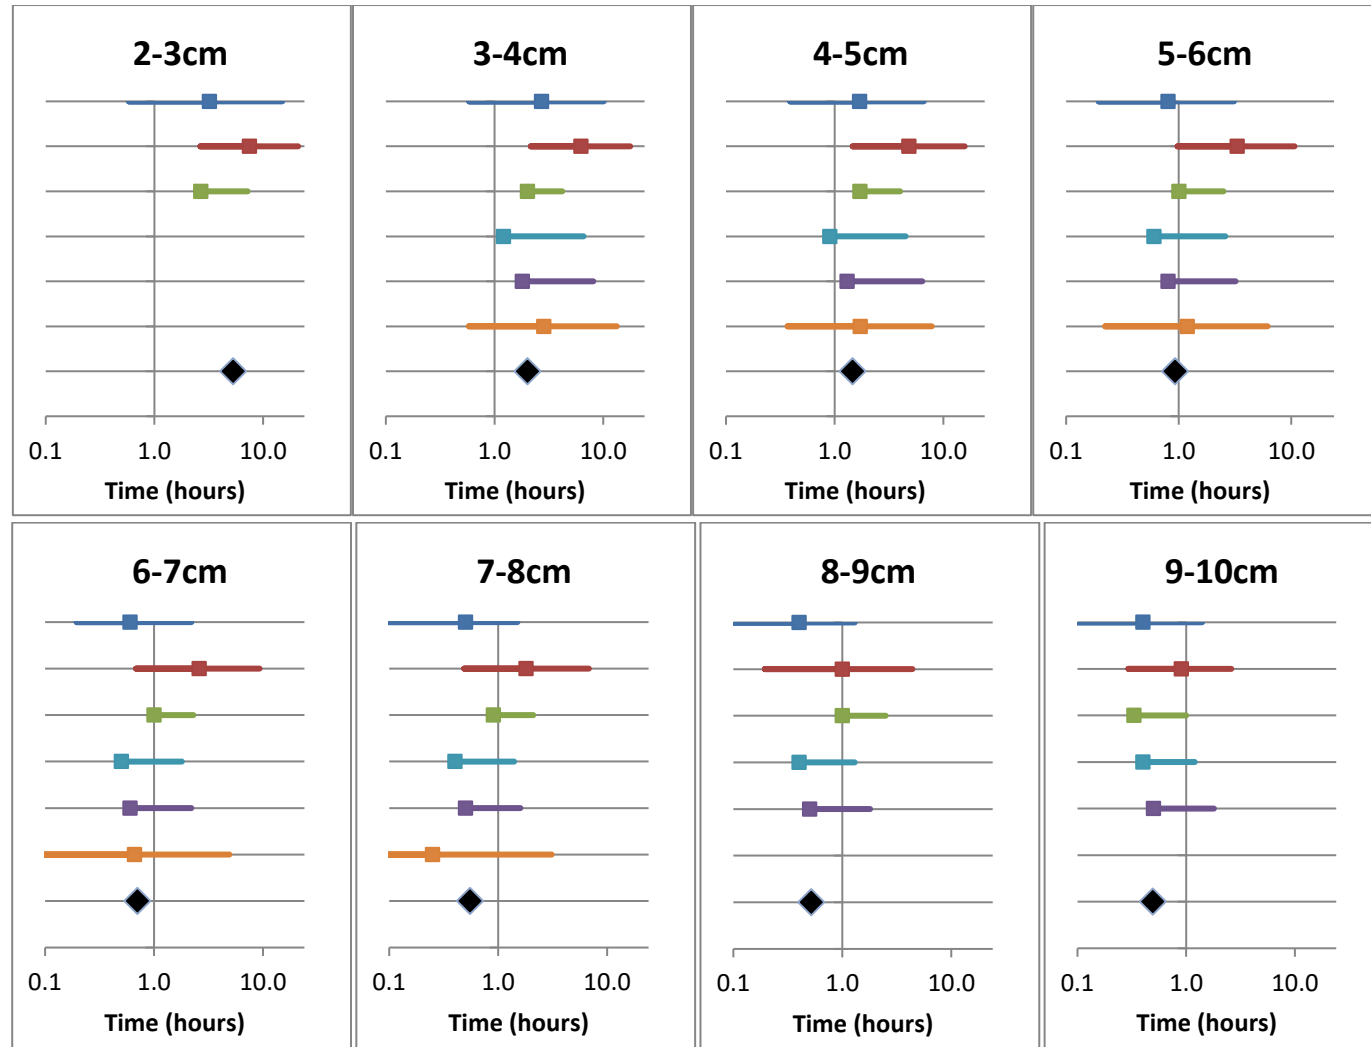

■ Zhang et al.<sup>7</sup> ■ Suzuki et al.<sup>24</sup> ■ Shi et al.<sup>22</sup> ■ Zhang et al.<sup>6</sup> ■ Zhang et al.<sup>21</sup> ■ Oladapo et al.<sup>25</sup> ◆ Pooled median

Figure S3. Panel showing the distribution of median time to gain 1 cm in nulliparous women by study
