# Supplementary material for: Cervical dilatation patterns of ‘low‐risk’ women with spontaneous labour and normal perinatal outcomes: a systematic review
Source: PubMed Central journal article supplement (PMC6033146; doi:10.1111/1471-0528.14930), 2017-11-03
Supplement: BJO-125-944-s004.pdf [file BJO-125-944-s004.pdf]

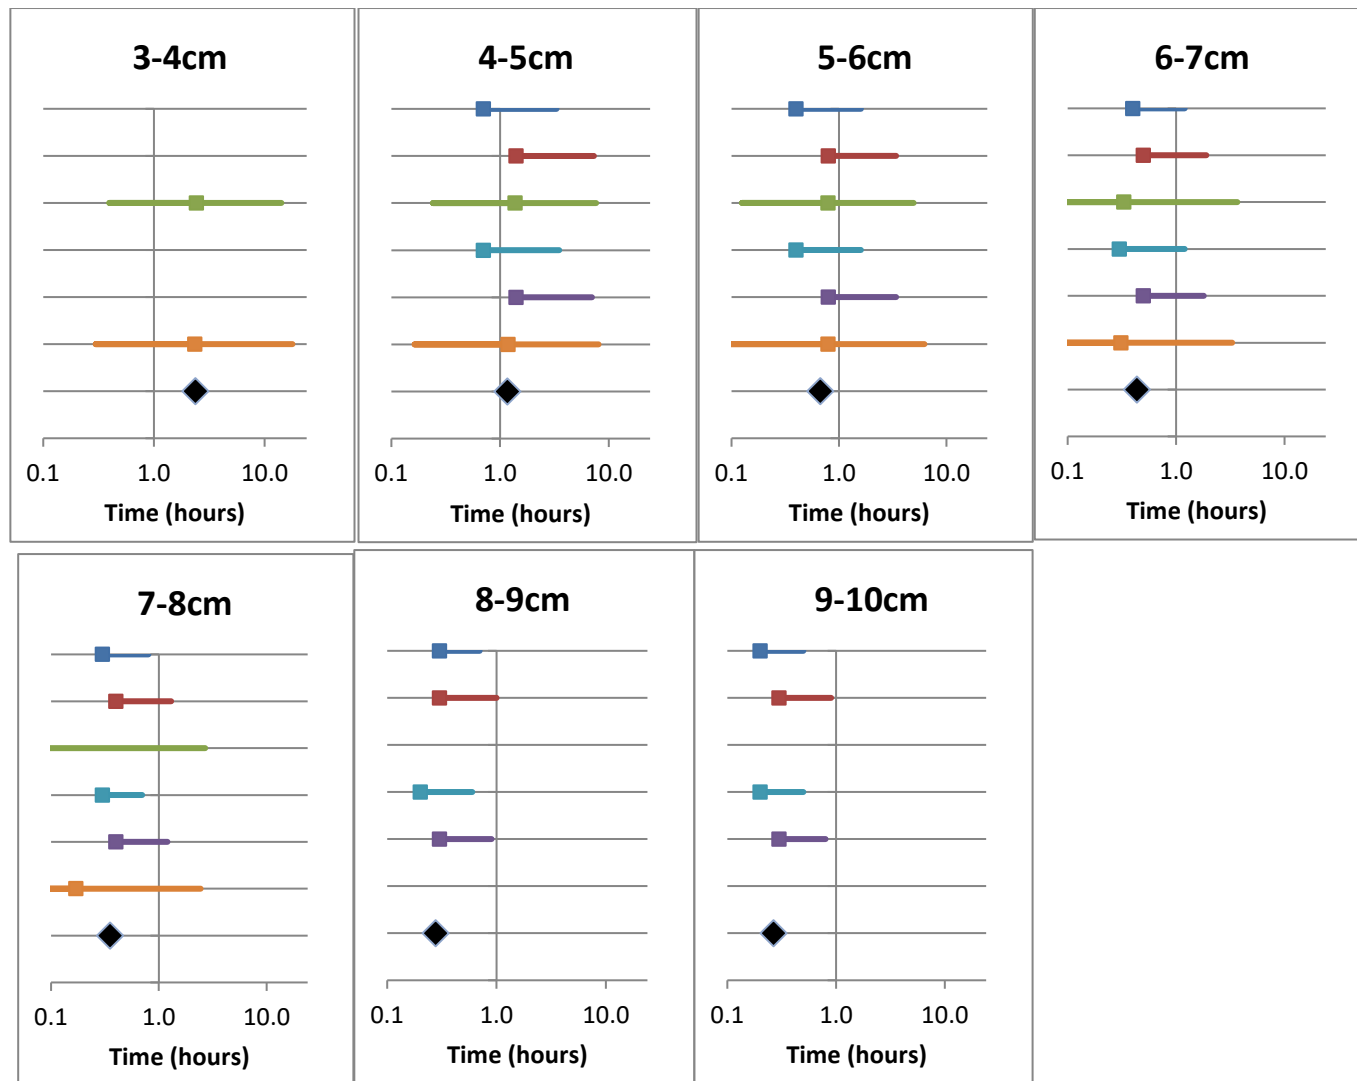

■ Zhang et al.<sup>6\*</sup> ■ Zhang et al.<sup>21\*</sup> ■ Oladapo et al.<sup>25\*</sup> ■ Zhang et al.<sup>6\*\*</sup> ■ Zhang et al.<sup>21\*\*</sup> ■ Oladapo et al.<sup>25\*\*</sup> ◆ Pooled median

\*Data for only parity=1; \*\*Data for only parity=2+

**Figure S4.** Panel showing the distribution of time to gain 1 cm in parous women by study
