# Supplementary material for: Cervical dilatation patterns of ‘low‐risk’ women with spontaneous labour and normal perinatal outcomes: a systematic review
Source: PubMed Central journal article supplement (PMC6033146; doi:10.1111/1471-0528.14930), 2017-11-03
Supplement: BJO-125-944-s005.pdf [file BJO-125-944-s005.pdf]

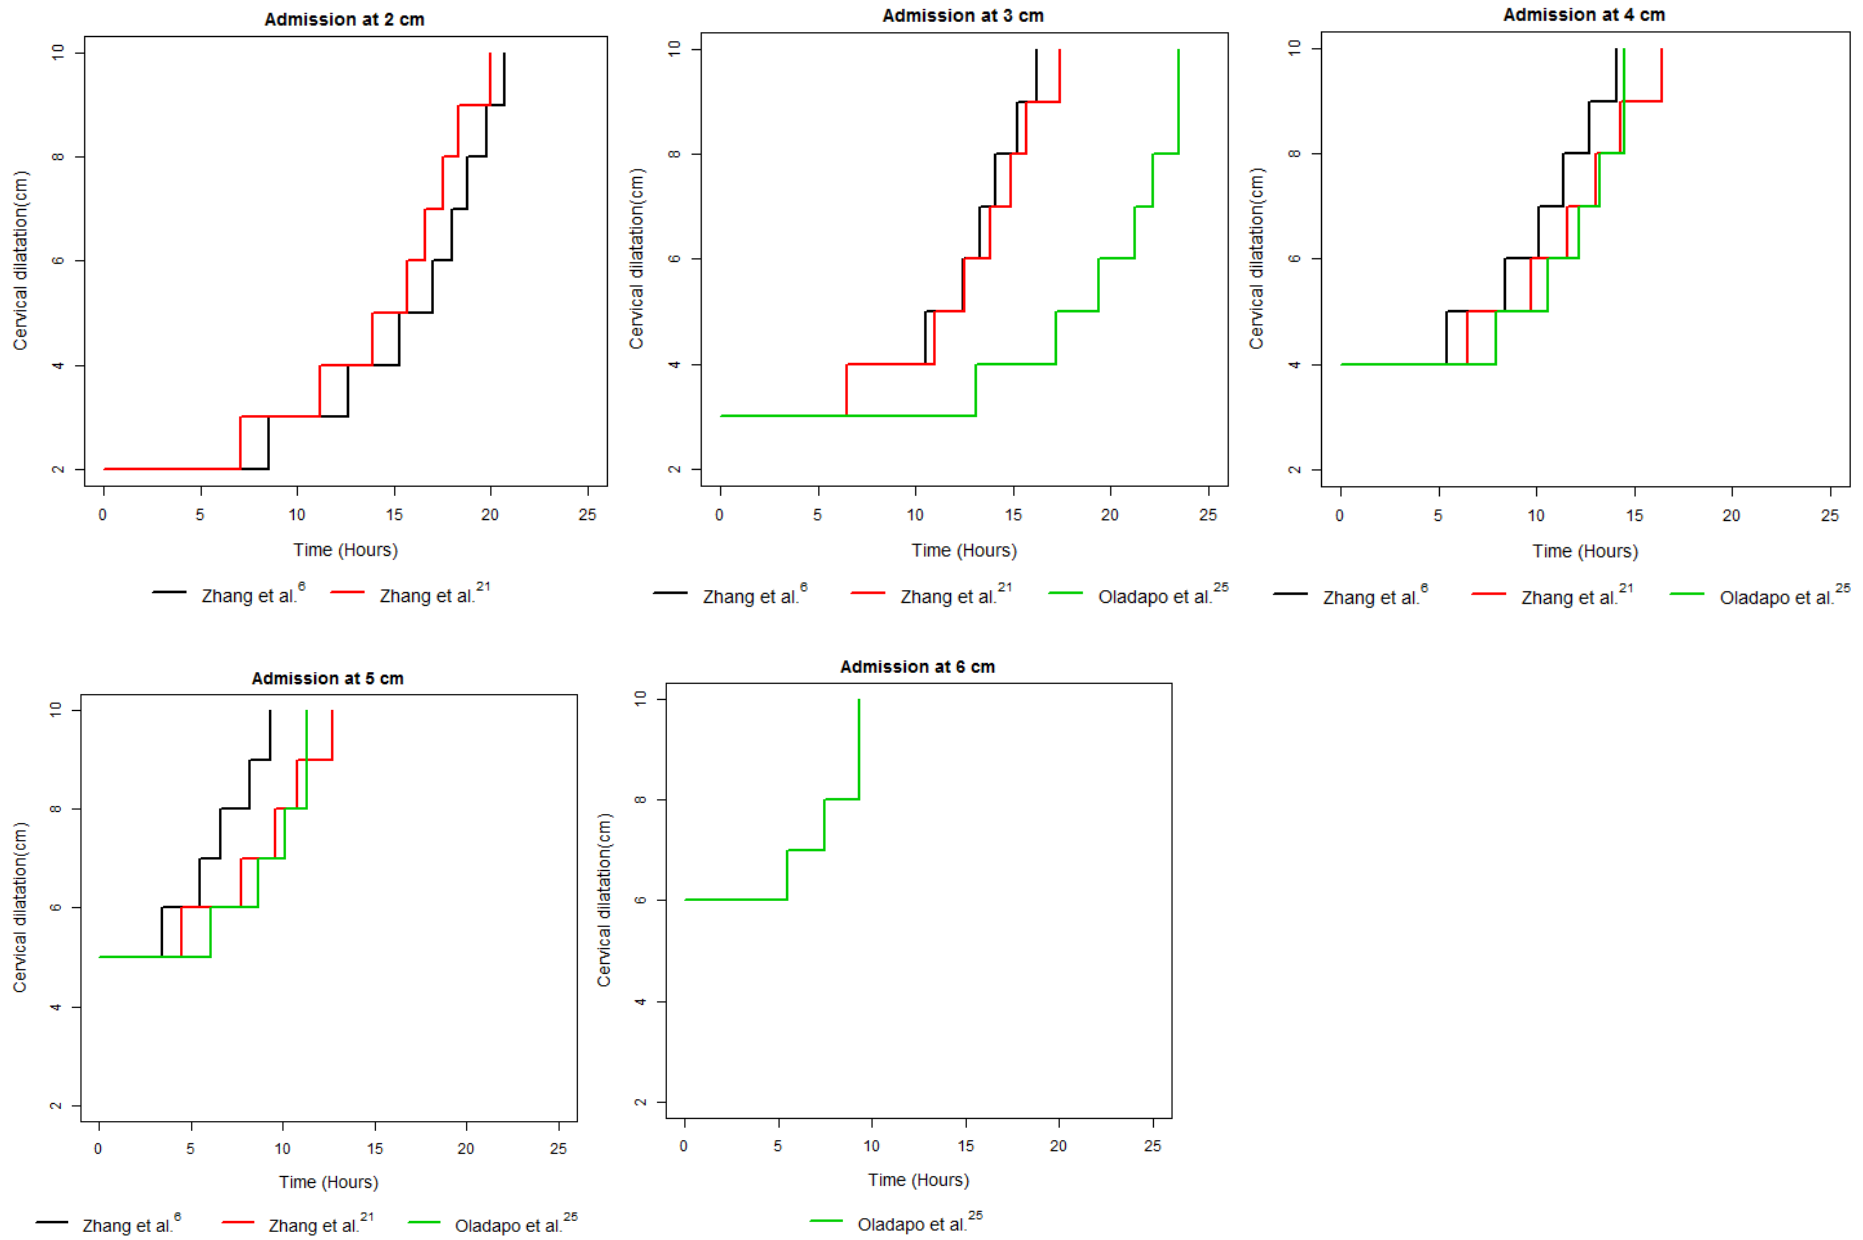

Figure S5. Panel showing 95th percentiles of cumulative duration of labour from admission by study among nulliparous women
