# Supplementary material for: Cervical dilatation patterns of ‘low‐risk’ women with spontaneous labour and normal perinatal outcomes: a systematic review
Source: PubMed Central journal article supplement (PMC6033146; doi:10.1111/1471-0528.14930), 2017-11-03
Supplement: BJO-125-944-s007.pdf [file BJO-125-944-s007.pdf]

**Table S1.** Characteristics of included studies and study populations (nulliparous)

| Study                        | Year of publication | Study design  | Years of data collection | Data collection method                                                                                                       | Data analysis method                                                        | Setting                                                                                                            | Sample size<br>N=43148 | Race/Ethnicity                                                                                            | Maternal age [mean, SD, years] | GA at delivery [mean (SD) weeks] | Maternal weight at delivery [mean (SD) kg] | BMI at delivery [mean (SD), kg/m <sup>2</sup> ] | Birth weight [mean (range) g] |
|------------------------------|---------------------|---------------|--------------------------|------------------------------------------------------------------------------------------------------------------------------|-----------------------------------------------------------------------------|--------------------------------------------------------------------------------------------------------------------|------------------------|-----------------------------------------------------------------------------------------------------------|--------------------------------|----------------------------------|--------------------------------------------|-------------------------------------------------|-------------------------------|
| Chen et al. <sup>23</sup>    | 1986                | Observational | 1982-1983                | Extraction of labour observations from labour chart                                                                          | Details not described. Nomogram was constructed through linear regression.  | Chan Gung Memorial Hospital, Taipei, Taiwan                                                                        | 500                    | Chinese:100%                                                                                              | 24.3                           | 39.5                             | –                                          | –                                               | 3206 (2500-3850)              |
| Zhang et al. <sup>7</sup>    | 2002                | Observational | 1992-1996                | Extraction of labour observations from labour chart                                                                          | Repeated-measures regression with a 10th-order polynomial function          | Tripler Army Medical Centre, a tertiary care facility serving military personnel and their families in Hawaii, USA | 1162                   | Non-Hispanic White: 65%;<br>Non-Hispanic Black:12%;<br>Hispanic: 7%;<br>Asian: 11%;<br>Other: 5%          | 23.0                           | 39.3                             | 76.7                                       | –                                               | 3206 (2500-3850)              |
| Suzuki et al. <sup>24</sup>  | 2010                | Observational | 2001-2005                | Extraction of labour observations from labour chart                                                                          | Repeated-measures regression with a 10th-order polynomial function          | 4 primary medical hospitals performing normal deliveries, Japan                                                    | 2369                   | Japanese:100%                                                                                             | 28.0(4.5)                      | 39.8 (0.9)                       | 61.7 (7.6)                                 | –                                               | 3036 (2104-4210)              |
| Zhang et al. <sup>6</sup>    | 2010                | Observational | 1959-1965                | Prospective data collection through in-person interviews, physical and laboratory exams and documentation in medical records | Repeated-measures regression with an 8th-order polynomial function          | 12 hospitals in the National Collaborative Perinatal Project, USA                                                  | 8690                   | White: 53%;<br>African- American: 39%;<br>Other: 8%                                                       | 20.3(3.9)                      | 39.8 (1.4)                       | –                                          | 25.4 (3.5)                                      | 3185                          |
| Zhang et al. <sup>21</sup>   | 2010                | Observational | 2002-2008                | Retrospective data extraction from electronic medical records                                                                | Repeated-measures regression with an 8th-order polynomial function          | 19 hospitals in the Consortium on Safe Labor Project, USA                                                          | 27170                  | White: 60%;<br>African- American: 12%;<br>Hispanic: 20%;<br>Asian or Pacific Islanders: 4%;<br>Others: 4% | 24.6(5.8)                      | 39.3 (1.2)                       | –                                          | 29.1 (5.0)                                      | 3296                          |
| Shi et al. <sup>22</sup>     | 2016                | Observational | 2013-2014                | Prospective data collection with the LaborPro system (Trig Medical Ltd, Yokneam, Israel)                                     | Repeated-measures regression with a 8th-order polynomial function           | First Affiliated Hospital of Chongqing Medical University, a university-based tertiary centre, China               | 1091                   | Chinese:100%                                                                                              | 27.0(3.2)                      | 39.5 (0.9)                       | –                                          | 26.1 (2.8)                                      | 3301                          |
| Oladapo et al. <sup>25</sup> | 2017                | Observational | 2014-2015                | Prospective data extraction following direct labour assessment                                                               | Survival analysis using interval censored times and Markov multistate model | 13 secondary/tertiary level hospitals in Nigeria and Uganda                                                        | 2166                   | Nigerian: 50.9%;<br>Ugandan: 49.1%                                                                        | 25.1(4.2)                      | 38.7(1.1)                        | 71.8 (11.6)                                | 28.1 (4.1)                                      | 3140                          |
