# Supplementary material for: Cervical dilatation patterns of ‘low‐risk’ women with spontaneous labour and normal perinatal outcomes: a systematic review
Source: PubMed Central journal article supplement (PMC6033146; doi:10.1111/1471-0528.14930), 2017-11-03
Supplement: BJO-125-944-s008.pdf [file BJO-125-944-s008.pdf]

**Table S2.** Characteristics of included studies and study populations (parous)

| Study                          | Year of publication | Study design  | Years of data collection | Data collection method                                                                                                       | Data analysis method                                                                        | Setting                                                           | Sample size<br>N=56823 | Parity | Race/Ethnicity                                                                                | Maternal age [mean, SD, years] | GA at delivery [mean (SD) weeks] | Maternal weight at delivery [mean (SD) kg] | BMI at delivery [mean (SD), kg/m <sup>2</sup> ] | Birthweight (mean, g) |
|--------------------------------|---------------------|---------------|--------------------------|------------------------------------------------------------------------------------------------------------------------------|---------------------------------------------------------------------------------------------|-------------------------------------------------------------------|------------------------|--------|-----------------------------------------------------------------------------------------------|--------------------------------|----------------------------------|--------------------------------------------|-------------------------------------------------|-----------------------|
| Zhang et al.* <sup>6</sup>     | 2010                | Observational | 1959-1965                | Prospective data collection through in-person interviews, physical and laboratory exams and documentation in medical records | Repeated-measures regression with an 8th-order polynomial function                          | 12 hospitals in the National Collaborative Perinatal Project, USA | 6373                   | 1      | White: 55%; African- American: 38%; Other: 7%                                                 | 22.7(4.4)                      | 39.8 (1.4)                       | –                                          | 25.9                                            | 3259                  |
| Zhang et al.** <sup>6</sup>    | 2010                | Observational | 1959-1965                | Prospective data collection through in-person interviews, physical and laboratory exams and documentation in medical records | Repeated-measures regression with an 8th-order polynomial function                          | 12 hospitals in the National Collaborative Perinatal Project, USA | 11765                  | >1     | White: 45%; African- American: 48%; Other: 7%                                                 | 27.4(5.5)                      | 39.8 (1.4)                       | –                                          | 27.1                                            | 3301                  |
| Zhang et al.* <sup>21</sup>    | 2010                | Observational | 2002-2008                | Retrospective data extraction from electronic medical records                                                                | Repeated-measures regression with an 8th-order polynomial function                          | 19 hospitals in the Consortium on Safe Labour Project, USA        | 17850                  | 1      | White: 55%; African- American: 12%; Hispanic: 26%; Asian or Pacific Islanders: 4%; Others: 3% | 27.7(5.7)                      | 39.2 (1.2)                       | –                                          | 29.6                                            | 3384                  |
| Zhang et al.** <sup>21</sup>   | 2010                | Observational | 2002-2008                | Retrospective data extraction from electronic medical records                                                                | Secondary analysis using repeated-measures regression with an 8th-order polynomial function | 19 hospitals in the Consortium on Safe Labour Project, USA        | 17395                  | >1     | White: 51%; African- American: 15%; Hispanic: 29%; Asian or Pacific Islanders: 2%; Others: 3% | 30.0(5.4)                      | 39.1 (1.1)                       | –                                          | 30.5                                            | 3384                  |
| Oladapo et al.* <sup>25</sup>  | 2017                | Observational | 2014-2015                | Prospective data extraction following direct labour assessment                                                               | Survival analysis using interval censored times                                             | 13 secondary/tertiary level hospitals in Nigeria and Uganda       | 1488                   | 1      | Nigerian: 43.3%; Ugandan: 56.7%                                                               | 27.1(4.1)                      | 38.7 (1.1)                       | 73.8                                       | 28.9                                            | 3278                  |
| Oladapo et al.** <sup>25</sup> | 2017                | Observational | 2014-2015                | Prospective data extraction following direct labour assessment                                                               | Nonlinear mixed model and survival analysis                                                 | 13 secondary/tertiary level hospitals in Nigeria and Uganda       | 1952                   | >1     | Nigerian: 40.6%; Ugandan: 59.4%                                                               | 30.9(4.6)                      | 38.8 (1.1)                       | 76.4                                       | 29.7                                            | 3348                  |

\*Data only for parity=1, \*\* Data only for parity>1
