# Supplementary material for: Cervical dilatation patterns of ‘low‐risk’ women with spontaneous labour and normal perinatal outcomes: a systematic review
Source: PubMed Central journal article supplement (PMC6033146; doi:10.1111/1471-0528.14930), 2017-11-03
Supplement: BJO-125-944-s010.pdf [file BJO-125-944-s010.pdf]

**Table S4.** Overall risk of bias assessment

| <b>Risk of bias domain</b>                      | <b>Chen et al.<sup>23</sup></b> | <b>Zhang et al.<sup>7</sup></b> | <b>Suzuki et al.<sup>24</sup></b> | <b>Zhang et al.<sup>6</sup></b> | <b>Zhang et al.<sup>21</sup></b> | <b>Shi et al.<sup>22</sup></b> | <b>Oladapo et al.<sup>25</sup></b> |
|-------------------------------------------------|---------------------------------|---------------------------------|-----------------------------------|---------------------------------|----------------------------------|--------------------------------|------------------------------------|
| Primary intent of the study research question   | +                               | +                               | +                                 | +                               | +                                | +                              | +                                  |
| Representativeness of the study population      | +                               | ?                               | ?                                 | +                               | +                                | +                              | +                                  |
| Ascertainment and temporality of observations   | ?                               | --                              | --                                | +                               | +                                | +                              | +                                  |
| Adequacy of data points for valid assessment    | ?                               | +                               | +                                 | +                               | +                                | +                              | --                                 |
| Use of a valid and robust approach for analysis | ?                               | +                               | +                                 | +                               | +                                | +                              | +                                  |
| Overall risk of bias                            | ++                              | +++                             | +++                               | +++++                           | +++++                            | +++++                          | ++++                               |

+ Low risk of bias, ? Unclear risk of bias, -- High risk of bias
